# Supplementary material for: Estimating EQ-5D utility values for major health behavioural risk factors in England
Source: HighWire-hosted journal article supplement (doi:10.1136/jech-2012-201019), 2012-07-29
Supplement: jech-2012-201019-s2.pdf [file jech-2012-201019-s2.pdf]

## Appendix B: Percentage difference in coefficient estimates between estimators<sup>#\*</sup>

|                                          |                                                 | Tobit V OLS | FLOGIT v OLS | FLOGIT v Tobit |
|------------------------------------------|-------------------------------------------------|-------------|--------------|----------------|
| <b>BMI</b>                               | 18.5 kg/m <sup>2</sup> to <25 kg/m <sup>2</sup> | Ref         | Ref          | Ref            |
|                                          | <18.5 kg/m <sup>2</sup>                         | 4474.57     | 1898.76      | 56.31          |
|                                          | 25 kg/m <sup>2</sup> to <30 kg/m <sup>2</sup>   | 58.91       | 3.79         | 34.69          |
|                                          | 30 kg/m <sup>2</sup> to <40 kg/m <sup>2</sup>   | 5.11        | 41.06        | 43.93          |
|                                          | 40+ kg/m <sup>2</sup>                           | 20.97       | 59.93        | 49.30          |
|                                          | Missing                                         | 22.25       | 54.39        | 41.34          |
| <b>Alcohol intake</b>                    | Never Drinker                                   | Ref         | Ref          | Ref            |
|                                          | <=4/day (men) or <=3/day (women)                | 17.93       | 54.21        | 44.20          |
|                                          | >4 and <=8(men) or >3 and <=6(women)            | 22.03       | 42.86        | 26.72          |
|                                          | >8/day (men) or >6/day (women)                  | 23.83       | 42.50        | 24.51          |
|                                          | Ex-Drinker                                      | 42.09       | 71.45        | 50.69          |
|                                          | Missing                                         | 22.88       | 13.64        | 47.36          |
| <b>Smoking</b>                           | Never Smoker                                    | Ref         | Ref          | Ref            |
|                                          | Light <10/day                                   | 13.27       | 37.80        | 45.09          |
|                                          | Moderate 10 to <20/day                          | 10.98       | 40.00        | 45.94          |
|                                          | Heavy 20+/day                                   | 7.63        | 52.66        | 48.75          |
|                                          | Ex-Smoker                                       | 1.12        | 43.15        | 43.78          |
|                                          | Missing                                         | 4.97        | 18.15        | 12.55          |
| <b>Fruit and Vegetable intake:</b>       | 5 or more portions/day                          | Ref         | Ref          | Ref            |
|                                          | 3 to <5 portions/day                            | 10.40       | 37.17        | 29.87          |
|                                          | 1 to <3 portions/day                            | 14.54       | 29.08        | 17.02          |
|                                          | <1 portions/day                                 | 6.12        | 63.72        | 61.36          |
| <b>Physical activity</b>                 | 5 moderate 30min episodes a week                | Ref         | Ref          | Ref            |
|                                          | 3 vigorous 30min & 5 mod 30 min a week          | 113.58      | 145.95       | 238.36         |
|                                          | 3 vigorous 30min episodes a week                | 2470.58     | 1956.87      | 21.67          |
|                                          | Active not meeting recommended levels           | 15.64       | 21.80        | 32.38          |
|                                          | Inactive                                        | 30.87       | 59.10        | 40.84          |
|                                          | Missing                                         | 30.33       | 41.87        | 16.56          |
| <b>Sex</b>                               | Male                                            | Ref         | Ref          | Ref            |
|                                          | Female                                          | 24.34       | 41.82        | 53.21          |
| <b>Age</b>                               | 16-24                                           | Ref         | Ref          | Ref            |
|                                          | 25-34                                           | 3.41        | 19.04        | 21.71          |
|                                          | 35-44                                           | 15.40       | 19.02        | 29.83          |
|                                          | 45-54                                           | 9.17        | 27.88        | 33.94          |
|                                          | 55-64                                           | 3.49        | 33.14        | 35.40          |
|                                          | 65-74                                           | 5.75        | 38.00        | 41.37          |
|                                          | 75+                                             | 7.81        | 42.40        | 46.57          |
| <b>Ethnic Origin</b>                     | White                                           | Ref         | Ref          | Ref            |
|                                          | Mixed                                           | 256.78      | 92.80        | 104.59         |
|                                          | Indian                                          | 51.81       | 74.14        | 46.33          |
|                                          | Pakistani                                       | 12.46       | 45.17        | 37.36          |
|                                          | Black Caribbean                                 | 193.59      | 38.90        | 165.28         |
|                                          | Black African                                   | 29.64       | 52.44        | 32.41          |
|                                          | Other                                           | 99.07       | 43.71        | 27.81          |
| <b>Marital status</b>                    | Single                                          | Ref         | Ref          | Ref            |
|                                          | Married/Civil partnerships                      | 10.65       | 31.93        | 38.48          |
|                                          | Separated                                       | 26.51       | 60.62        | 46.41          |
|                                          | Divorced                                        | 35.36       | 70.80        | 54.83          |
|                                          | Widowed                                         | 78.37       | 90.81        | 57.54          |
|                                          | Cohabitees                                      | 8.58        | 58.53        | 54.64          |
| <b>Social class</b>                      | I                                               | Ref         | Ref          | Ref            |
|                                          | II                                              | 24.45       | 2.61         | 17.55          |
|                                          | IIN                                             | 43.44       | 5.26         | 33.95          |
|                                          | IIIM                                            | 17.31       | 25.72        | 36.68          |
|                                          | IV                                              | 6.21        | 29.84        | 33.94          |
|                                          | V                                               | 22.30       | 17.68        | 32.69          |
|                                          | Armed forces                                    | 18.94       | 30.29        | 41.39          |
|                                          | Missing                                         | 0.58        | 26.01        | 25.58          |
| <b>Highest Educational qualification</b> | NVQ4/NVQ5/Degree or equivalent                  | Ref         | Ref          | Ref            |
|                                          | Higher education below degree                   | 18.71       | 15.60        | 28.90          |
|                                          | NVQ3/GCE A Level equivalent                     | 80.75       | 38.75        | 23.24          |
|                                          | NVQ2/GCE O Level equivalent                     | 83.51       | 55.35        | 15.34          |
|                                          | NVQ1/CSE other grade equivalent                 | 5.36        | 14.17        | 20.63          |
|                                          | Foreign/other                                   | 113.70      | 145.14       | 229.61         |
|                                          | No qualification                                | 23.90       | 53.17        | 38.46          |
| <b>Equalised Income</b>                  | Highest Quintile                                | Ref         | Ref          | Ref            |
|                                          | 2 <sup>nd</sup> Highest Quintile                | 47.03       | 3.96         | 34.68          |
|                                          | Middle Quintile                                 | 17.47       | 3.97         | 18.25          |
|                                          | 2 <sup>nd</sup> Lowest Quintile                 | 1.44        | 31.13        | 30.12          |
|                                          | Lowest Quintile                                 | 7.55        | 43.87        | 39.28          |
|                                          | Missing                                         | 21.11       | 13.79        | 28.82          |

#Only percentage difference in each regression coefficient derived from each estimator comparable.

\*Two Part Model omitted as coefficients not directly comparable to OLS, Tobit or FLOGIT models.

OLS: Ordinary Least Squares

FLOGIT: Fractional logit
